# Supplementary material for: Thermal activation significantly improves the organic pollutant removal rate of low-grade manganese ore in a peroxymonosulfate system
Source: Royal Society of Chemistry journal article supplement (doi:10.1039/d2ra02970g), 2022-01-01
Supplement: d2ra02970g1.pdf [file d2ra02970g1.pdf]

## Supplementary document

### **Thermal activation significantly improves the organic pollutant removal rate of low-grade manganese ore in peroxymonosulfate system**

*Yi Chen<sup>a</sup>, Ping Yin<sup>b</sup>, Shuai Dong<sup>a</sup>, Shiyue Wei<sup>a</sup>, Jinchuan Gu<sup>a\*</sup>, Wanglai Cen<sup>c</sup>*

<sup>a</sup> School of Food and Bioengineering, Civil Engineering and Architecture and Environment, Xihua University, Chengdu, 610039, PR China

<sup>b</sup> Sichuan Rongxinkai Engineering Design Co.Ltd., Chengdu, 610041, PR China

<sup>c</sup> National Engineering Research Center for Flue Gas Desulfurization, Sichuan University, Chengdu 610065, China

\*Corresponding author: *Jinchuan Gu*; E-mail address: [gu6471@163.com](mailto:gu6471@163.com)

## **Text 1. Effects of operational parameters**

### **1. Effect of initial concentration**

As shown in **Figure S9(a)**, when the AO7 initial concentrations ( $C_0$ ) were 20 mg/L and 40 mg/L, the AO7 removal efficiencies in the CNMO/PMS system were similar, reaching 99.1%-99.2%, with the fastest reaction rate ( $k_{obs}$ ), 0.1056 min<sup>-1</sup>, obtained when  $C_0$  was 20 mg/L (**Figure S5(a)**). However, with the increase of  $C_0$ , the AO7 removal efficiency and  $k_{obs}$  in the CNMO/PMS system decreased significantly. This could be mainly attributed to the fact that, as the initial concentration of AO7 increased, the ROS provided by a certain amount of PMS became insufficient, thus reducing degradation efficiency<sup>1</sup>.

### **2. Effects of catalyst dosage**

More active sites can decompose more PMS into ROS in a given time, which is conducive to promoting the degradation of pollutants. In this study, when the catalyst dosage ( $M_{CNMO}$ ) increased from 0.5 g/L to 1.5 g/L, the  $k_{obs}$  and removal efficiency increased obviously (**Figure S5(b)** and **Figure S9(b)**), reaching 2.09 times and 1.31 times of 0.5 g/L, respectively. The rate of ROS generation accelerated with the increased CNMO, possibly suggesting the reason for the remarkable degradation effect on AO7<sup>2</sup>. However, AO7 removal efficiency did not change significantly when  $M_{CNMO}$  was greater than 1.5 g/L, possibly limited by the PMS dosage ( $M_{PMS}$ ) of the CNMO/PMS system.

### **3. Effect of PMS dosage**

The effect of  $M_{PMS}$  (0.08-0.46 mM) was subsequently investigated to ascertain the most suitable amount of oxidant for AO7 degradation in the CNMO/PMS system. The AO7 removal efficiency and  $k_{obs}$  increased with the increase in  $M_{PMS}$  (**Figure S9(c)**). When the  $M_{PMS}$  was 0.46 mM, AO7 removal efficiency reached 98.11%, with  $k_{obs}$  at 0.1134 min<sup>-1</sup>, indicating that PMS dosage was the limiting factor in the removal of AO7. Previous studies have reported that more PMS can enhance mass transfer between CNMO and PMS, resulting in a greater concentration of ROS for the removal of AO7<sup>3,4</sup>.

#### 4. Effect of initial pH

Generally, the influence of different initial pH levels on the catalytic system cannot be ignored. As shown in **Figure S7(d)**, the CNMO/PMS system maintained a high AO7 removal rate (> 97.50%) under both strong acid (pH = 2) and strong base (pH = 9) conditions. Even at pH = 11, the removal rate of the CNMO/PMS system was still able to reach 88.67%. The results indicate that CNMO has excellent PMS activation performance within a wide initial pH range (pH = 2-11), thereby deeming it a good prospect for practical application.

#### 5. Effect of reaction temperature

The effect of reaction temperature on AO7 degradation in the CNMO/PMS system is shown in **Figure S7(e)** and **Figure S5(e)**. As the temperature increased from 15 °C to 45 °C, the removal rate and  $k_{obs}$  increased, with the  $k_{obs}$  significantly enhanced from 0.0665 min<sup>-1</sup> to 0.1431 min<sup>-1</sup>, thus demonstrating that reaction temperature exerts a notable influence on AO7 degradation in the CNMO/PMS system. In addition, as shown in the plot of  $\ln(k_{obs})$  versus 1000/T (**Figure S7(f)**), when the  $E_a$  of AO7 in the system was calculated using the Arrhenius equation (Eq. (2)) it was found to be 20.62 kJ mol<sup>-1</sup>, which is lower than previously reported values<sup>1,2</sup> and demonstrated the ease of activation of PMS by CNMO.

#### Text 2. Measurement of oxidative intermediate species

In order to further understand the AO7 degradation pathway, the intermediates in the AO7 degradation process were analyzed by GCMS-QP2020NX, with eight intermediates detected (**Table S4**). First, the <sup>1</sup>O<sub>2</sub> generated in the CNMO/PMS system attacked the -N=N- of AO7 and broke the bond, thereby forming 1-amino-2-naphthol and 4-aminobenzenesulfonic acid. Thereafter, the 1-amino-2-naphthol was oxidized to form P1/P2/P3 (Pathway I), while 1-amino-2-naphthol was oxidized to P4-P6 and, finally, to P7 and P8 (Pathway II). Finally, these intermediates of AO7 degradation could further react with ROS and convert into CO<sub>2</sub> and H<sub>2</sub>O (**Figure S10**).

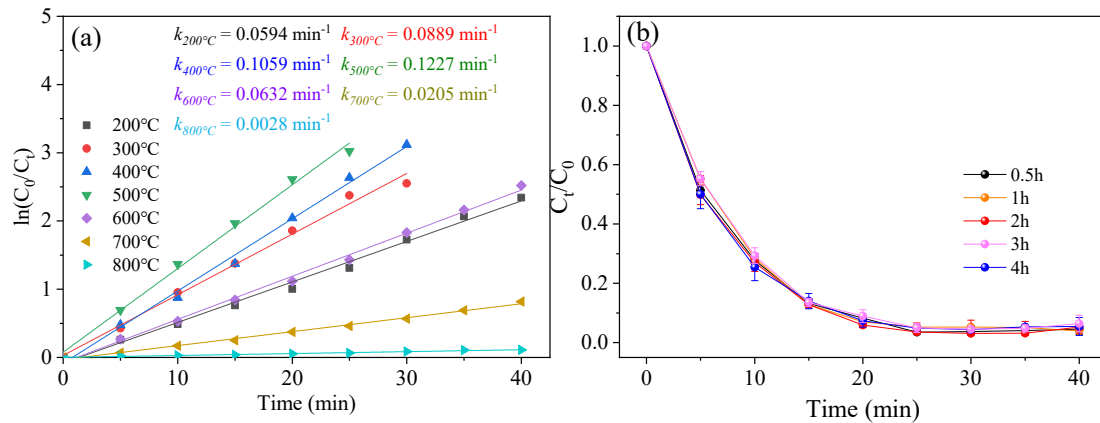

**Figure S1.**  $\ln(C_0/C_t)$  versus time plot for degradation of AO7 by NMO thermal activation after different temperature (a) and the effect of catalyst calcination time on AO7 removal efficiency (b) (Conditions:  $C_0 = 20 \text{ mg/L}$ ,  $M_{\text{GBO}} = 0.9 \text{ g/L}$ ,  $M_{\text{PMS}} = 0.15 \text{ mM}$ ,  $\text{pH} = 6.6$ ,  $T = 25^\circ\text{C}$ ).

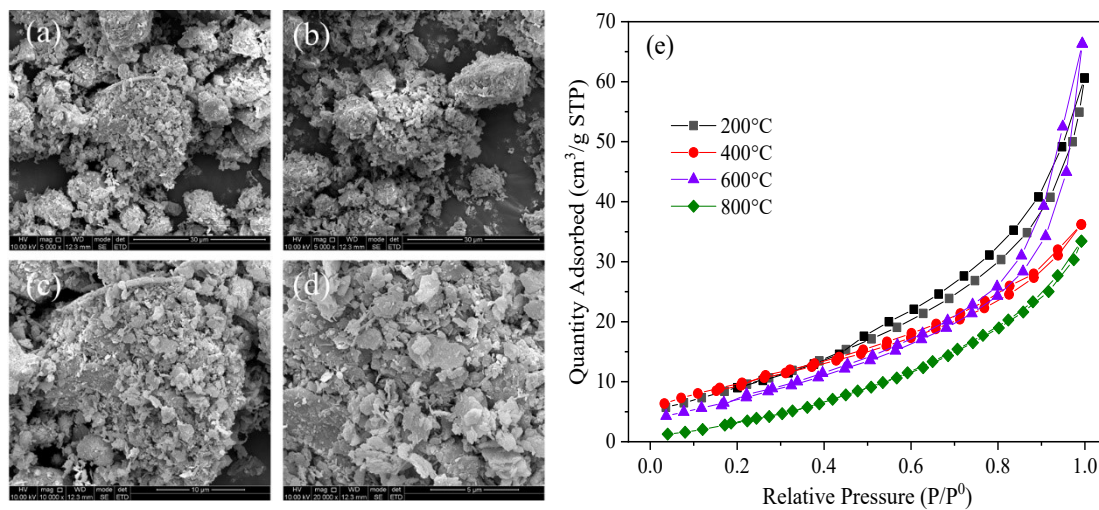

**Figure S2.** (a-d) SEM micrograph of NMO, (e) the  $\text{N}_2$  adsorption-desorption isotherm of NMO calcined after different temperature.

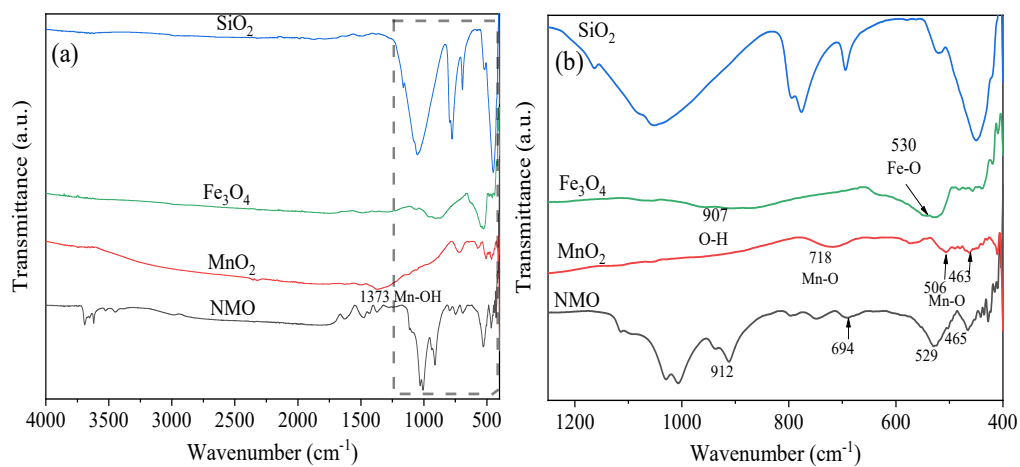

**Figure S3.** FTIR spectrum of NMO, pure  $\text{MnO}_2$ ,  $\text{Fe}_3\text{O}_4$  and  $\text{SiO}_2$ .

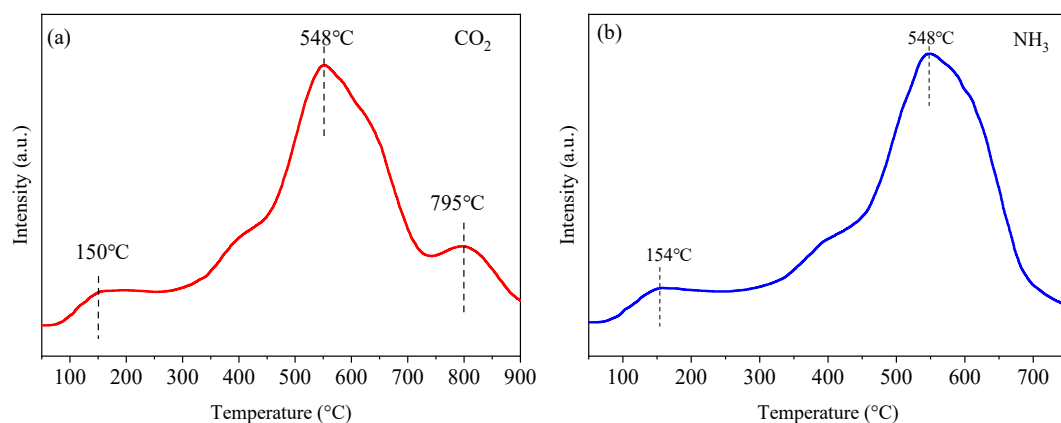

**Figure S4.** (a) CO<sub>2</sub>-TPD and (b) NH<sub>3</sub>-TPD of NMO.

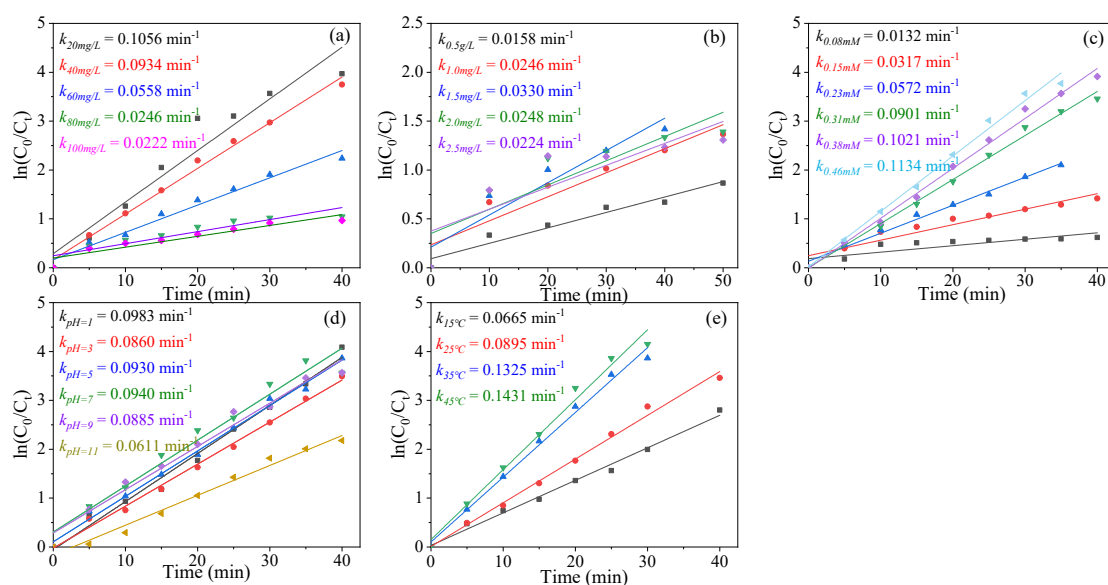

**Figure S5.**  $\ln(C_0/C_t)$  versus time plot for degradation of AO7 by CNMO at different initial concentration (20-100 mg/L,  $M_{\text{CNMO}} = 0.9$  g/L,  $M_{\text{PMS}} = 0.15$  mM) (a), Catalyst dosage (0.5-2.5 mg/L,  $M_{\text{PMS}} = 0.15$  mM) (b), PMS dosage (0.08-0.46 mM) (c), initial pH (pH = 1-11) (d) and reaction temperature (15-45 °C) (e). (Conditions:  $C_0 = 100$  mg/L,  $M_{\text{CGO}} = 1.5$  g/L,  $M_{\text{PMS}} = 0.31$  mM, pH = 6.6, T = 25°C)

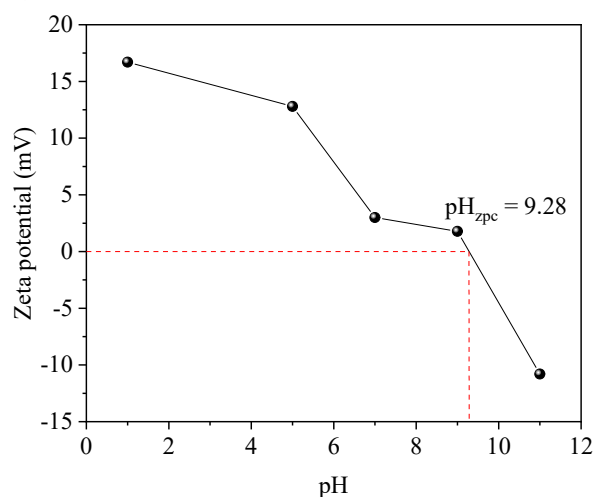

**Figure S6.** pH<sub>zpc</sub> of the CNMO by Zeta potential method.

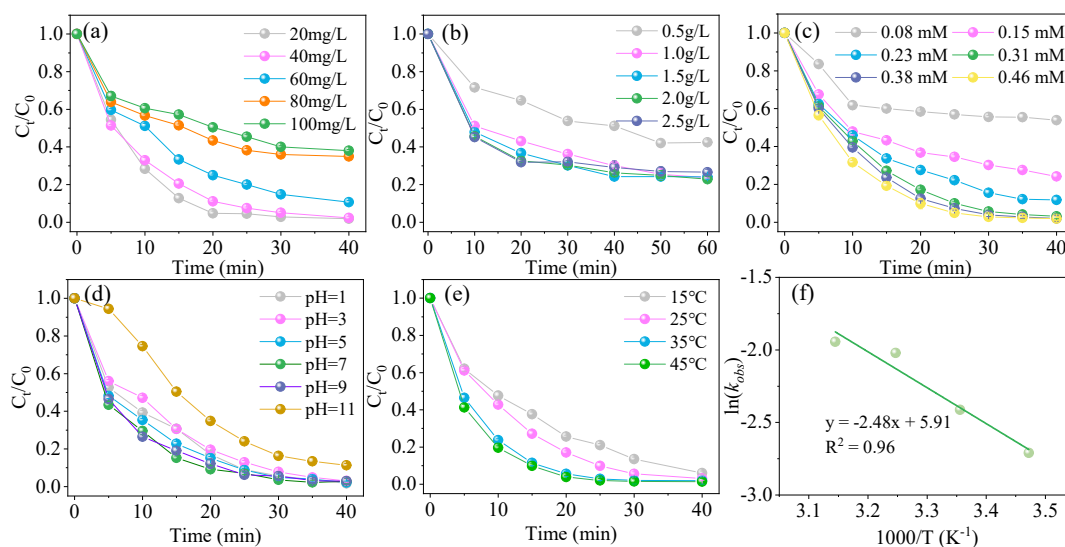

**Figure S7.** Effect of different experimental parameters on AO7 removal efficiency: (a) Initial concentration (20-100 mg/L,  $M_{\text{CNMO}} = 0.9$  g/L,  $M_{\text{PMS}} = 0.15$  mM) (b); catalyst dosages (0.5-2.5 mg/L,  $M_{\text{PMS}} = 0.15$  mM); (c) PMS dosage (0.08-0.46 mM); (d) initial pH (pH = 1-11); (e) reaction temperatures (15-45 °C); and (f) the plot of  $\ln(k_{\text{obs}})$  versus  $1000/T$  in the CNMO/PMS oxidation. (Conditions:  $C_0 = 100$  mg/L,  $M_{\text{CNMO}} = 1.5$  g/L,  $M_{\text{PMS}} = 0.31$  mM, pH = 6.6, T = 25 °C)

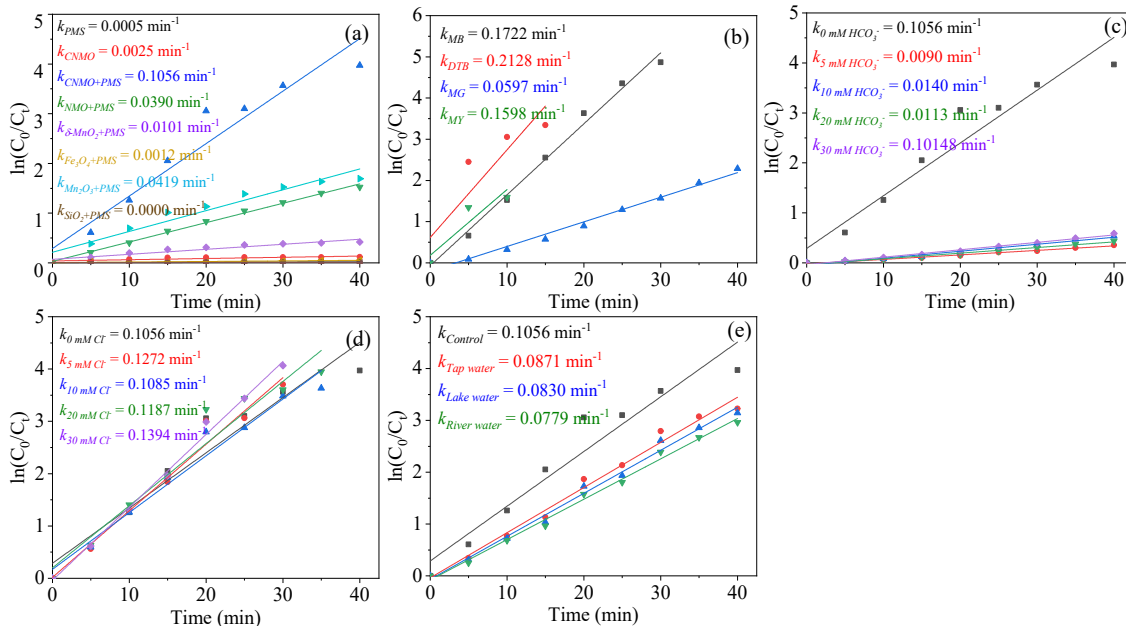

**Figure S8.**  $\ln(C_0/C_t)$  versus time plot for degradation of AO7 in various systems (a), degradation of different pollutants in the CNMO/PMS system (b), degradation of AO7 in system contained  $\text{HCO}_3^-$  (c) and  $\text{Cl}^-$  (d), AO7 removal in actual water (e). (Conditions:  $C_0 = 20$  mg/L,  $M_{\text{GBO}} = 0.9$  g/L,  $M_{\text{PMS}} = 0.15$  mM, pH = 6.6, T = 25 °C).

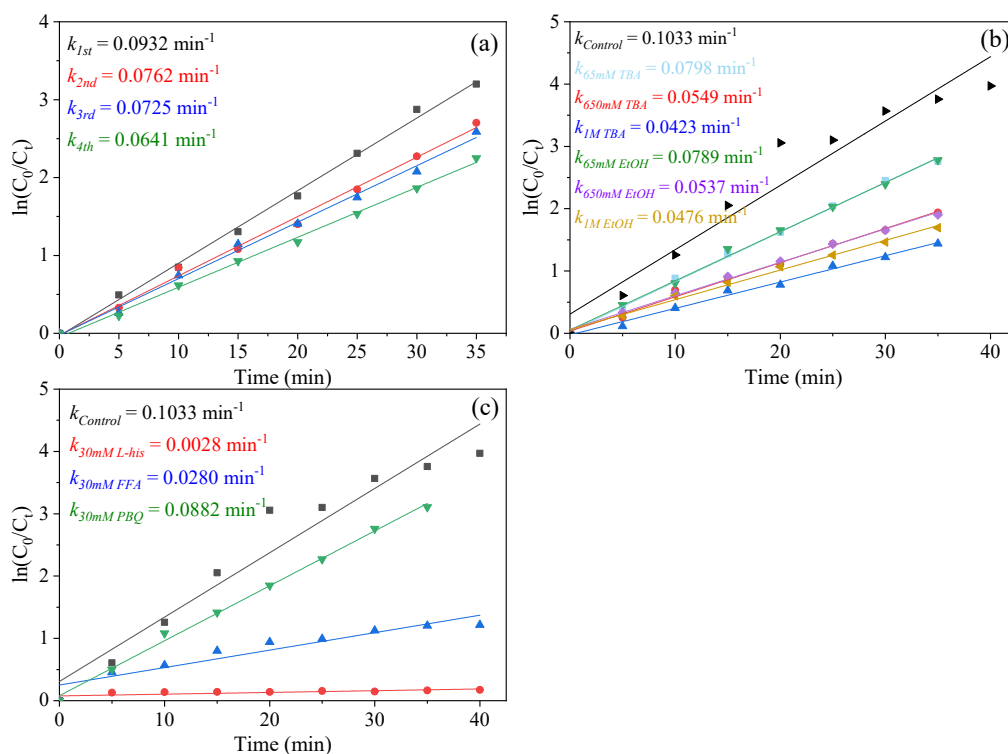

**Figure S9.**  $\ln(C_0/C_t)$  versus time plot for degradation of AO7 in each recycling process (a), in the CNMO/PMS system under different quenching conditions (b-c). (Conditions:  $C_0 = 100$  mg/L,  $M_{\text{CNMO}} = 1.5$  g/L,  $M_{\text{PMS}} = 0.31$  mM, pH = 6.6, T = 25 °C)

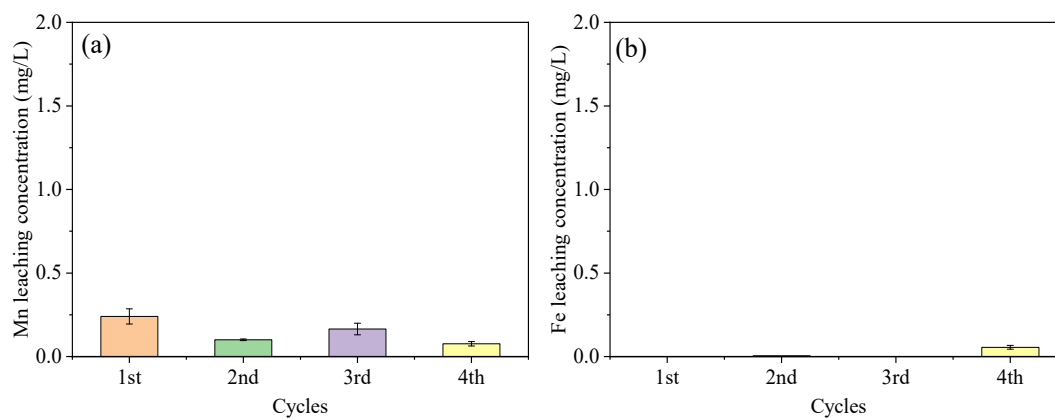

**Figure S10.** Mn (a) and Fe (b) leaching concentration in each recycling process. (Conditions:  $C_0 = 100$  mg/L,  $M_{\text{CGO}} = 1.5$  g/L,  $M_{\text{PMS}} = 0.31$  mM, pH = 6.6 T = 25°C)

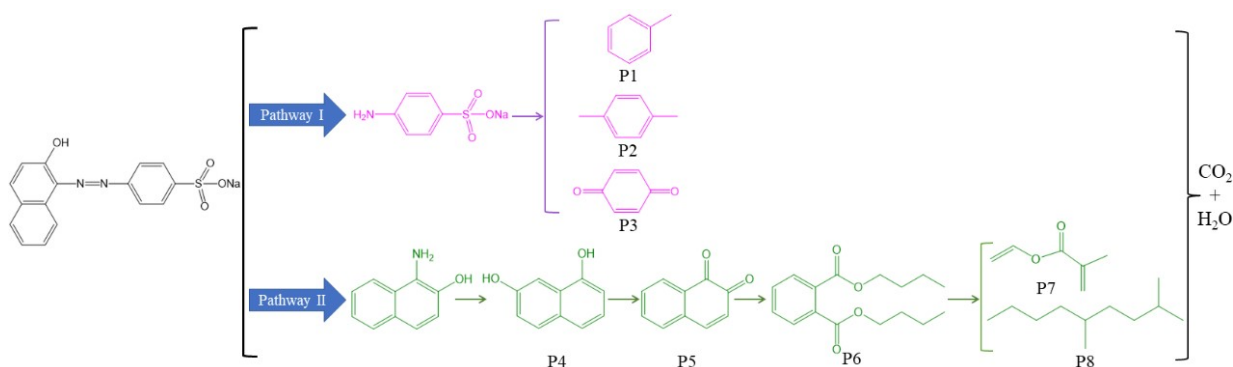

**Figure S11.** Degradation pathways of AO7 in the CMNO/PMS system.

**Table S1** Textural properties of NMO thermal activation after different temperature.

| Thermal activation temperature<br>°C | S <sub>BET</sub><br>m <sup>2</sup> /g | V <sub>tot</sub><br>cm <sup>3</sup> /g | D <sub>p</sub><br>nm |
|--------------------------------------|---------------------------------------|----------------------------------------|----------------------|
| 200                                  | 31.67                                 | 0.094                                  | 10.571               |
| 400                                  | 33.53                                 | 0.056                                  | 6.324                |
| 600                                  | 24.45                                 | 0.103                                  | 14.622               |
| 800                                  | 10.98                                 | 0.052                                  | 12.152               |

S<sub>BET</sub>: BET surface area; V<sub>tot</sub>: total pores volume; D<sub>p</sub>: average pore size.

**Table S2** The acid amount of NMO and CNMO.

| Sample | Acid amount (mmol/g) |                         |                     | The total acid amounts<br>(mmol/g) |
|--------|----------------------|-------------------------|---------------------|------------------------------------|
|        | Weak<br>(< 250°C)    | Medium<br>(250°C-400°C) | Strong<br>(> 400°C) |                                    |
| NMO    | 0.052                | 0.081                   | 0.481               | 0.614                              |
| CNMO   | 0.063                | 0.087                   | 0.538               | 0.688                              |

**Table S3** The total organic carbon (TOC) of actual water.

| Actual water | Tap<br>water | Lake water | River water |
|--------------|--------------|------------|-------------|
| TOC (mg/L)   | 1.799        | 2.560      | 2.135       |

**Table S4** Possible intermediates of AO7 degradation.

| No. | Compound name                 | Molar mass | Tentative<br>structure                                                               | RT<br>(min) |
|-----|-------------------------------|------------|--------------------------------------------------------------------------------------|-------------|
| P1  | toluene                       | 92         |   | 3.150       |
| P2  | p-xylene                      | 106        |  | 4.680       |
| P3  | p-benzoquinone                | 108        |  | 5.535       |
| P4  | 1,7-dihydroxynaphthalene      | 160        |  | 22.460      |
| P5  | 1,2-naphthoquinone            | 158        |  | 19.665      |
| P6  | dibutyl phthalate             | 278        |  | 26.905      |
| P7  | Methacrylic acid, vinyl ester | 112        |  | 3.640       |



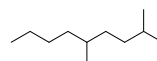

## References

1. L. Hou, X. Li, Q. Yang, F. Chen, S. Wang, Y. Ma, Y. Wu, X. Zhu, X. Huang and D. Wang, *Science of The Total Environment*, 2019, **663**, 453-464.
2. J. Deng, S. Feng, X. Ma, C. Tan, H. Wang, S. Zhou, T. Zhang and J. Li, *Separation and Purification Technology*, 2016, **167**, 181-189.
3. J. You, C. Zhang, Z. Wu, Z. Ao, W. Sun, Z. Xiong, S. Su, G. Yao and B. Lai, *Chemical Engineering Journal*, 2021, **415**, 128890.
4. H. Zhou, L. Lai, Y. Wan, Y. He, G. Yao and B. Lai, *Chemical Engineering Journal*, 2020, **384**, 123264.
